# Supplementary material for: Sustainable Antioxidant Production for Hygienic Disinfection Using Bioextractants from Lavender and Oregano Distillation Process
Source: MDPI journal article supplement (doi:10.3390/en16227534), 2023-11-12
Supplement: s1 [file s1]

Archive with 1 entries (1 files):
- energies-2647067-supplementary.pdf
