# Supplementary material for: Sustainable Antioxidant Production for Hygienic Disinfection Using Bioextractants from Lavender and Oregano Distillation Process
Source: MDPI journal article supplement (doi:10.3390/en16227534), 2023-11-12
Supplement: s1 [file s1 › energies-2647067-supplementary.pdf]

Product-name: **Formula #1 Disinfectant 80 % with Lavender Oil and Water** | Batch No.: Product No.1

**Remarks:**

Methods used: Dilution neutralization method, pour plate method  
 Number of plates: 2/mL  
 Neutralizer: Polysorbate 80: 30 g/L; saponin: 30 g/L; lecithin: 3 g/L in diluent  
 Test temperature: 20 °C  
 Test organism: *Pseudomonas aeruginosa*  
 Incubation temperature: 36 °C

Diluent used for product test solutions: distilled water  
 Appearance of the product test solutions: clear

**Validation and controls**

| Validation suspension (Nvo)    |     |          | Neutralizer control (B)         |    |         | Method validation (C)<br>Product concentration: 80% |    |         |
|--------------------------------|-----|----------|---------------------------------|----|---------|-----------------------------------------------------|----|---------|
| Vc1                            | 98  | x̄ = 101 | Vc1                             | 93 | x̄ = 95 | Vc1                                                 | 82 | x̄ = 86 |
| Vc2                            | 103 |          | Vc2                             | 96 |         | Vc2                                                 | 89 |         |
| Is 30 ≤ x̄ of Nvo ≤ 160? - YES |     |          | Is x̄ of B ≥ 0,5x of Nvo? – YES |    |         | Is x̄ of C ≥ 0,5x x̄ of Nvo? – YES                  |    |         |

**Test suspension**

| N                | Vc1 | Vc2 | $\bar{x}_{\text{um}} = 211,81 \times 10^6$ (LOG <sub>10</sub> N = 8,33)<br>No = N/10 (LOG <sub>10</sub> N <sub>0</sub> = 7,33)<br>Is $7,17 \leq \text{LOG}_{10} \text{No} \leq 7,70$ ? - YES |
|------------------|-----|-----|----------------------------------------------------------------------------------------------------------------------------------------------------------------------------------------------|
| 10 <sup>-6</sup> | 195 | 224 |                                                                                                                                                                                              |
| 10 <sup>-7</sup> | 22  | 25  |                                                                                                                                                                                              |

**Test**

| Concentration<br>of the product % | Vc1      | Vc2      | Na = 10 $\bar{x}$ | LOG <sub>10</sub> Na | LOG <sub>10</sub> R<br>(N <sub>0</sub> = 7,33) | Contact-time<br>(min) |
|-----------------------------------|----------|----------|-------------------|----------------------|------------------------------------------------|-----------------------|
| 80                                | 0 (< 14) | 0 (< 14) | < 140             | < 2,15               | > 5,18                                         | 5 min                 |

**Explanations**

Vc = count per mL (one plate or more)  
 $\bar{x}$  = average of Vc1 and Vc2  
 $\bar{x}_{\text{um}}$  = weighted mean of  $\bar{x}$   
 R = reduction (LOG<sub>10</sub> R = LOG<sub>10</sub> N<sub>0</sub> - LOG<sub>10</sub> Na)

Product-name: **Formula #1 Disinfectant 80 % with Lavender Oil and Water** | Batch No.: Product No.1

**Remarks:**

Methods used: Dilution neutralization method, pour plate method  
 Number of plates: 2/mL  
 Neutralizer: Polysorbate 80: 30 g/L; saponin: 30 g/L; lecithin: 3 g/L in diluent  
 Test temperature: 20 °C  
 Test organism: *Staphylococcus aureus*  
 Incubation temperature: 36 °C

Diluent used for product test solutions: distilled water  
 Appearance of the product test solutions: clear

**Validation and controls**

| Validation suspension (Nvo)                           |     |                 | Neutralizer control (B)                            |     |                 | Method validation (C)<br>Product concentration: 80%          |     |                 |
|-------------------------------------------------------|-----|-----------------|----------------------------------------------------|-----|-----------------|--------------------------------------------------------------|-----|-----------------|
| Vc1                                                   | 125 | $\bar{x} = 121$ | Vc1                                                | 112 | $\bar{x} = 109$ | Vc1                                                          | 104 | $\bar{x} = 100$ |
| Vc2                                                   | 116 |                 | Vc2                                                | 105 |                 | Vc2                                                          | 95  |                 |
| Is $30 \leq \bar{x}$ of Nvo $\leq 160$ ? - <b>YES</b> |     |                 | Is $\bar{x}$ of B $\geq 0,5x$ of Nvo? - <b>YES</b> |     |                 | Is $\bar{x}$ of C $\geq 0,5x$ $\bar{x}$ of Nvo? - <b>YES</b> |     |                 |

**Test suspension**

| N                | Vc1 | Vc2 | $\bar{x}_{\text{um}} = 232,73 \times 10^6$ (LOG <sub>10</sub> N = 8,37)<br>No = N/10 (LOG <sub>10</sub> N <sub>0</sub> = 7,37)<br>Is $7,17 \leq \text{LOG}_{10} \text{No} \leq 7,70$ ? - YES |
|------------------|-----|-----|----------------------------------------------------------------------------------------------------------------------------------------------------------------------------------------------|
| 10 <sup>-6</sup> | 244 | 229 |                                                                                                                                                                                              |
| 10 <sup>-7</sup> | 21  | 18  |                                                                                                                                                                                              |

**Test**

| Concentration<br>of the product % | Vc1      | Vc2      | Na = 10 $\bar{x}$ | LOG <sub>10</sub> Na | LOG <sub>10</sub> R<br>(N <sub>0</sub> = 7,37) | Contact-time<br>(min) |
|-----------------------------------|----------|----------|-------------------|----------------------|------------------------------------------------|-----------------------|
| 80                                | 0 (< 14) | 0 (< 14) | < 140             | < 2,15               | > 5,22                                         | 5 min                 |

**Explanations**

Vc = count per mL (one plate or more)  
 $\bar{x}$  = average of Vc1 and Vc2  
 $\bar{x}_{\text{um}}$  = weighted mean of  $\bar{x}$   
 R = reduction (LOG<sub>10</sub> R = LOG<sub>10</sub> N<sub>0</sub> - LOG<sub>10</sub> Na)

**Figure S1. Bactericidal activity of Formula #1 Disinfectant 80 % with Lavender Oil and Water.**

Product-name: **Formula #2 Disinfectant 75 % with Lavender Oil and Water** | Batch No.: Product No.2

**Remarks:**

Methods used: Dilution neutralization method, pour plate method  
 Number of plates: 2/mL  
 Neutralizer: Polysorbate 80: 30 g/L; saponin: 30 g/L; lecithin: 3 g/L in diluent  
 Test temperature: 20 °C  
 Test organism: *Pseudomonas aeruginosa*  
 Incubation temperature: 36 °C

Diluent used for product test solutions: distilled water  
 Appearance of the product test solutions: clear

**Validation and controls**

| Validation suspension (Nvo)           |     |          | Neutralizer control (B)                |    |         | Method validation (C)<br>Product concentration: 80% |    |         |
|---------------------------------------|-----|----------|----------------------------------------|----|---------|-----------------------------------------------------|----|---------|
| Vc1                                   | 98  | x̄ = 101 | Vc1                                    | 93 | x̄ = 95 | Vc1                                                 | 82 | x̄ = 86 |
| Vc2                                   | 103 |          | Vc2                                    | 96 |         | Vc2                                                 | 89 |         |
| Is 30 ≤ x̄ of Nvo ≤ 160? - <b>YES</b> |     |          | Is x̄ of B ≥ 0,5x of Nvo? – <b>YES</b> |    |         | Is x̄ of C ≥ 0,5x x̄ of Nvo? – <b>YES</b>           |    |         |

**Test suspension**

| N                | Vc1 | Vc2 | $\bar{x}_{wm} = 211,81 \times 10^6$ (LOG <sub>10</sub> N = 8,33)<br>$N_0 = N/10$ (LOG <sub>10</sub> N <sub>0</sub> = 7,33)<br>Is $7,17 \leq \text{LOG}_{10} N_0 \leq 7,70$ ? - YES |
|------------------|-----|-----|------------------------------------------------------------------------------------------------------------------------------------------------------------------------------------|
| 10 <sup>-6</sup> | 195 | 224 |                                                                                                                                                                                    |
| 10 <sup>-7</sup> | 22  | 25  |                                                                                                                                                                                    |

**Test**

| Concentration of the product % | Vc1      | Vc2      | Na = 10 $\bar{x}$ | LOG <sub>10</sub> Na | LOG <sub>10</sub> R (N <sub>0</sub> = 7,33) | Contact-time (min) |
|--------------------------------|----------|----------|-------------------|----------------------|---------------------------------------------|--------------------|
| 80                             | 0 (< 14) | 0 (< 14) | < 140             | < 2,15               | > 5,18                                      | 5 min              |

**Explanations**

Vc = count per mL (one plate or more)  
 $\bar{x}$  = average of Vc1 and Vc2  
 $\bar{x}_{wm}$  = weighted mean of  $\bar{x}$   
 R = reduction (LOG<sub>10</sub> R = LOG<sub>10</sub> N<sub>0</sub> - LOG<sub>10</sub> Na)

Product-name: **Formula #2 Disinfectant 75 % with Lavender Oil and Water** | Batch No.: Product No.2

**Remarks:**

Methods used: Dilution neutralization method, pour plate method  
 Number of plates: 2/mL  
 Neutralizer: Polysorbate 80: 30 g/L; saponin: 30 g/L; lecithin: 3 g/L in diluent  
 Test temperature: 20 °C  
 Test organism: *Staphylococcus aureus*  
 Incubation temperature: 36 °C

Diluent used for product test solutions: distilled water  
 Appearance of the product test solutions: clear

**Validation and controls**

| Validation suspension (Nvo)                           |     |                 | Neutralizer control (B)                            |     |                 | Method validation (C)<br>Product concentration: 80%          |     |                 |
|-------------------------------------------------------|-----|-----------------|----------------------------------------------------|-----|-----------------|--------------------------------------------------------------|-----|-----------------|
| Vc1                                                   | 125 | $\bar{x} = 121$ | Vc1                                                | 112 | $\bar{x} = 109$ | Vc1                                                          | 104 | $\bar{x} = 100$ |
| Vc2                                                   | 116 |                 | Vc2                                                | 105 |                 | Vc2                                                          | 95  |                 |
| Is $30 \leq \bar{x}$ of Nvo $\leq 160$ ? - <b>YES</b> |     |                 | Is $\bar{x}$ of B $\geq 0,5x$ of Nvo? - <b>YES</b> |     |                 | Is $\bar{x}$ of C $\geq 0,5x$ $\bar{x}$ of Nvo? - <b>YES</b> |     |                 |

**Test suspension**

| N                | Vc1 | Vc2 | $\bar{x}_{wm} = 232,73 \times 10^6$ (LOG <sub>10</sub> N = 8,37)<br>$N_0 = N/10$ (LOG <sub>10</sub> N <sub>0</sub> = 7,37)<br>Is $7,17 \leq \text{LOG}_{10} N_0 \leq 7,70$ ? - YES |
|------------------|-----|-----|------------------------------------------------------------------------------------------------------------------------------------------------------------------------------------|
| 10 <sup>-6</sup> | 244 | 229 |                                                                                                                                                                                    |
| 10 <sup>-7</sup> | 21  | 18  |                                                                                                                                                                                    |

**Test**

| Concentration of the product % | Vc1      | Vc2      | Na = 10 $\bar{x}$ | LOG <sub>10</sub> Na | LOG <sub>10</sub> R (N <sub>0</sub> = 7,37) | Contact-time (min) |
|--------------------------------|----------|----------|-------------------|----------------------|---------------------------------------------|--------------------|
| 80                             | 0 (< 14) | 0 (< 14) | < 140             | < 2,15               | > 5,22                                      | 5 min              |

**Explanations**

Vc = count per mL (one plate or more)  
 $\bar{x}$  = average of Vc1 and Vc2  
 $\bar{x}_{wm}$  = weighted mean of  $\bar{x}$   
 R = reduction (LOG<sub>10</sub> R = LOG<sub>10</sub> N<sub>0</sub> - LOG<sub>10</sub> Na)

**Figure S2. Bactericidal activity of Formula #1 Disinfectant 75 % with Lavender Oil and Water.**

Product-name: **Formula #3 Disinfectant 70 % with Lavender Oil and Water** | Batch No.: Product No.3

Remarks:

Methods used: Dilution neutralization method, pour plate method  
 Number of plates: 2/mL  
 Neutralizer: Polysorbate 80: 30 g/L; saponin: 30 g/L; lecithin: 3 g/L in diluent  
 Test temperature: 20 °C  
 Test organism: *Pseudomonas aeruginosa*  
 Incubation temperature: 36 °C

Diluent used for product test solutions: distilled water  
 Appearance of the product test solutions: clear

**Validation and controls**

| Validation suspension (Nvo)                           |     |                 | Neutralizer control (B)                            |    |                | Method validation (C)<br>Product concentration: 80%          |    |                |
|-------------------------------------------------------|-----|-----------------|----------------------------------------------------|----|----------------|--------------------------------------------------------------|----|----------------|
| Vc1                                                   | 98  | $\bar{x} = 101$ | Vc1                                                | 93 | $\bar{x} = 95$ | Vc1                                                          | 83 | $\bar{x} = 89$ |
| Vc2                                                   | 103 |                 | Vc2                                                | 96 |                | Vc2                                                          | 94 |                |
| Is $30 \leq \bar{x}$ of Nvo $\leq 160$ ? - <b>YES</b> |     |                 | Is $\bar{x}$ of B $\geq 0,5x$ of Nvo? - <b>YES</b> |    |                | Is $\bar{x}$ of C $\geq 0,5x$ $\bar{x}$ of Nvo? - <b>YES</b> |    |                |

**Test suspension**

| N                | Vc1 | Vc2 | $\bar{x}_{\text{am}} = 211,81 \times 10^6$ (LOG <sub>10</sub> N = 8,33)<br>$N_0 = N/10$ (LOG <sub>10</sub> N <sub>0</sub> = 7,33)<br>Is $7,17 \leq \text{LOG}_{10} N_0 \leq 7,70$ ? - YES |
|------------------|-----|-----|-------------------------------------------------------------------------------------------------------------------------------------------------------------------------------------------|
| 10 <sup>-6</sup> | 195 | 224 |                                                                                                                                                                                           |
| 10 <sup>-7</sup> | 22  | 25  |                                                                                                                                                                                           |

**Test**

| Concentration of the product % | Vc1      | Vc2      | Na = 10 $\bar{x}$ | LOG <sub>10</sub> Na | LOG <sub>10</sub> R (N <sub>0</sub> = 7,33) | Contact-time (min) |
|--------------------------------|----------|----------|-------------------|----------------------|---------------------------------------------|--------------------|
| 80                             | 0 (< 14) | 0 (< 14) | < 140             | < 2,15               | > 5,18                                      | 5 min              |

Explanations

Vc = count per mL (one plate or more)  
 $\bar{x}$  = average of Vc1 and Vc2  
 $\bar{x}_{\text{am}}$  = weighted mean of  $\bar{x}$   
 R = reduction (LOG<sub>10</sub> R = LOG<sub>10</sub> N<sub>0</sub> - LOG<sub>10</sub> Na)

Product-name: **Formula #3 Disinfectant 70 % with Lavender Oil and Water** | Batch No.: Product No.3

Remarks:

Methods used: Dilution neutralization method, pour plate method  
 Number of plates: 2/mL  
 Neutralizer: Polysorbate 80: 30 g/L; saponin: 30 g/L; lecithin: 3 g/L in diluent  
 Test temperature: 20 °C  
 Test organism: *Staphylococcus aureus*  
 Incubation temperature: 36 °C

Diluent used for product test solutions: distilled water  
 Appearance of the product test solutions: clear

**Validation and controls**

| Validation suspension (Nvo)                    |     |                 | Neutralizer control (B)                     |     |                 | Method validation (C)<br>Product concentration: 80%   |     |                 |
|------------------------------------------------|-----|-----------------|---------------------------------------------|-----|-----------------|-------------------------------------------------------|-----|-----------------|
| Vc1                                            | 125 | $\bar{x} = 121$ | Vc1                                         | 112 | $\bar{x} = 109$ | Vc1                                                   | 116 | $\bar{x} = 108$ |
| Vc2                                            | 116 |                 | Vc2                                         | 105 |                 | Vc2                                                   | 100 |                 |
| Is $30 \leq \bar{x}$ of Nvo $\leq 160$ ? - YES |     |                 | Is $\bar{x}$ of B $\geq 0,5x$ of Nvo? – YES |     |                 | Is $\bar{x}$ of C $\geq 0,5x$ $\bar{x}$ of Nvo? – YES |     |                 |

**Test suspension**

| N                | Vc1 | Vc2 | $\bar{x}_{\text{am}} = 232,73 \times 10^6$ (LOG <sub>10</sub> N = 8,37)<br>$N_0 = N/10$ (LOG <sub>10</sub> N <sub>0</sub> = 7,37)<br>Is $7,17 \leq \text{LOG}_{10} N_0 \leq 7,70$ ? - YES |
|------------------|-----|-----|-------------------------------------------------------------------------------------------------------------------------------------------------------------------------------------------|
| 10 <sup>-6</sup> | 244 | 229 |                                                                                                                                                                                           |
| 10 <sup>-7</sup> | 21  | 18  |                                                                                                                                                                                           |

**Test**

| Concentration of the product % | Vc1      | Vc2      | Na = 10 $\bar{x}$ | LOG <sub>10</sub> Na | LOG <sub>10</sub> R (N <sub>0</sub> = 7,37) | Contact-time (min) |
|--------------------------------|----------|----------|-------------------|----------------------|---------------------------------------------|--------------------|
| 80                             | 0 (< 14) | 0 (< 14) | < 140             | < 2,15               | > 5,22                                      | 5 min              |

Explanations

Vc = count per mL (one plate or more)  
 $\bar{x}$  = average of Vc1 and Vc2  
 $\bar{x}_{\text{am}}$  = weighted mean of  $\bar{x}$   
 R = reduction (LOG<sub>10</sub> R = LOG<sub>10</sub> N<sub>0</sub> - LOG<sub>10</sub> Na)

**Figure S3. Bactericidal activity of Formula #1 Disinfectant 70 % with Lavender Oil and Water.**

Product-name: **Formula #5 Disinfectant 80 % with Oregano Oil and Oregano Water** | Batch No.: Product No.5

**Remarks:**

Methods used: Dilution neutralization method, pour plate method  
 Number of plates: 2/mL  
 Neutralizer: Polysorbate 80: 30 g/L; saponin: 30 g/L; lecithin: 3 g/L in diluent  
 Test temperature: 20 °C  
 Test organism: *Pseudomonas aeruginosa*  
 Incubation temperature: 36 °C

Diluent used for product test solutions: distilled water  
 Appearance of the product test solutions: clear

**Validation and controls**

| Validation suspension (Nvo)           |     |          | Neutralizer control (B)                |    |         | Method validation (C)<br>Product concentration: 80% |    |         |
|---------------------------------------|-----|----------|----------------------------------------|----|---------|-----------------------------------------------------|----|---------|
| Vc1                                   | 98  | x̄ = 101 | Vc1                                    | 93 | x̄ = 95 | Vc1                                                 | 80 | x̄ = 84 |
| Vc2                                   | 103 |          | Vc2                                    | 96 |         | Vc2                                                 | 88 |         |
| Is 30 ≤ x̄ of Nvo ≤ 160? - <b>YES</b> |     |          | Is x̄ of B ≥ 0,5x of Nvo? – <b>YES</b> |    |         | Is x̄ of C ≥ 0,5x of Nvo? – <b>YES</b>              |    |         |

**Test suspension**

| N                | Vc1 | Vc2 | $\bar{x}_{wm} = 211,81 \times 10^6$ (LOG <sub>10</sub> N = 8,33)<br>$N_0 = N/10$ (LOG <sub>10</sub> N <sub>0</sub> = 7,33)<br>Is $7,17 \leq \text{LOG}_{10} N_0 \leq 7,70$ ? - YES |
|------------------|-----|-----|------------------------------------------------------------------------------------------------------------------------------------------------------------------------------------|
| 10 <sup>-6</sup> | 195 | 224 |                                                                                                                                                                                    |
| 10 <sup>-7</sup> | 22  | 25  |                                                                                                                                                                                    |

**Test**

| Concentration of the product % | Vc1      | Vc2      | Na = 10 $\bar{x}$ | LOG <sub>10</sub> Na | LOG <sub>10</sub> R (N <sub>0</sub> = 7,33) | Contact-time (min) |
|--------------------------------|----------|----------|-------------------|----------------------|---------------------------------------------|--------------------|
| 80                             | 0 (< 14) | 0 (< 14) | < 140             | < 2,15               | > 5,18                                      | 5 min              |

**Explanations**

Vc = count per mL (one plate or more)  
 $\bar{x}$  = average of Vc1 and Vc2  
 $\bar{x}_{wm}$  = weighted mean of  $\bar{x}$   
 R = reduction (LOG<sub>10</sub> R = LOG<sub>10</sub> N<sub>0</sub> - LOG<sub>10</sub> Na)

Product-name: **Formula #5 Disinfectant 80 % with Oregano Oil and Oregano Water** | Batch No.: Product No.5

**Remarks:**

Methods used: Dilution neutralization method, pour plate method  
 Number of plates: 2/mL  
 Neutralizer: Polysorbate 80: 30 g/L; saponin: 30 g/L; lecithin: 3 g/L in diluent  
 Test temperature: 20 °C  
 Test organism: *Staphylococcus aureus*  
 Incubation temperature: 36 °C

Diluent used for product test solutions: distilled water  
 Appearance of the product test solutions: clear

**Validation and controls**

| Validation suspension (Nvo)           |     |          | Neutralizer control (B)                |     |          | Method validation (C)<br>Product concentration: 80% |     |          |
|---------------------------------------|-----|----------|----------------------------------------|-----|----------|-----------------------------------------------------|-----|----------|
| Vc1                                   | 125 | x̄ = 121 | Vc1                                    | 112 | x̄ = 109 | Vc1                                                 | 111 | x̄ = 102 |
| Vc2                                   | 116 |          | Vc2                                    | 105 |          | Vc2                                                 | 92  |          |
| Is 30 ≤ x̄ of Nvo ≤ 160? - <b>YES</b> |     |          | Is x̄ of B ≥ 0,5x of Nvo? - <b>YES</b> |     |          | Is x̄ of C ≥ 0,5x x̄ of Nvo? - <b>YES</b>           |     |          |

**Test suspension**

| N                | Vc1 | Vc2 | $\bar{x}_{wm} = 232,73 \times 10^6$ (LOG <sub>10</sub> N = 8,37)<br>$N_0 = N/10$ (LOG <sub>10</sub> N <sub>0</sub> = 7,37)<br>Is $7,17 \leq \text{LOG}_{10} N_0 \leq 7,70$ ? - YES |
|------------------|-----|-----|------------------------------------------------------------------------------------------------------------------------------------------------------------------------------------|
| 10 <sup>-6</sup> | 244 | 229 |                                                                                                                                                                                    |
| 10 <sup>-7</sup> | 21  | 18  |                                                                                                                                                                                    |

**Test**

| Concentration of the product % | Vc1      | Vc2      | Na = 10 $\bar{x}$ | LOG <sub>10</sub> Na | LOG <sub>10</sub> R (N <sub>0</sub> = 7,37) | Contact-time (min) |
|--------------------------------|----------|----------|-------------------|----------------------|---------------------------------------------|--------------------|
| 80                             | 0 (< 14) | 0 (< 14) | < 140             | < 2,15               | > 5,22                                      | 5 min              |

**Explanations**

Vc = count per mL (one plate or more)  
 $\bar{x}$  = average of Vc1 and Vc2  
 $\bar{x}_{wm}$  = weighted mean of  $\bar{x}$   
 R = reduction (LOG<sub>10</sub> R = LOG<sub>10</sub> N<sub>0</sub> - LOG<sub>10</sub> Na)

**Figure S4. Bactericidal activity of Formula #1 Disinfectant 80 % with Oregano Oil and Water.**

Product-name: **Formula #6 Disinfectant 75 % with Oregano Oil and Oregano Water** | Batch No.: Product No.6

**Remarks:**

Methods used: Dilution neutralization method, pour plate method  
 Number of plates: 2/mL  
 Neutralizer: Polysorbate 80: 30 g/L; saponin: 30 g/L; lecithin: 3 g/L in diluent  
 Test temperature: 20 °C  
 Test organism: *Pseudomonas aeruginosa*  
 Incubation temperature: 36 °C

Diluent used for product test solutions: distilled water  
 Appearance of the product test solutions: clear

**Validation and controls**

| Validation suspension (Nvo)           |     |          | Neutralizer control (B)                |    |         | Method validation (C)<br>Product concentration: 80% |    |         |
|---------------------------------------|-----|----------|----------------------------------------|----|---------|-----------------------------------------------------|----|---------|
| Vc1                                   | 98  | x̄ = 101 | Vc1                                    | 93 | x̄ = 95 | Vc1                                                 | 80 | x̄ = 84 |
| Vc2                                   | 103 |          | Vc2                                    | 96 |         | Vc2                                                 | 88 |         |
| Is 30 ≤ x̄ of Nvo ≤ 160? - <b>YES</b> |     |          | Is x̄ of B ≥ 0,5x of Nvo? - <b>YES</b> |    |         | Is x̄ of C ≥ 0,5x x̄ of Nvo? - <b>YES</b>           |    |         |

**Test suspension**

| N                | Vc1 | Vc2 | $\bar{x}_{\text{um}} = 211,81 \times 10^6$ (LOG <sub>10</sub> N = 8,33)<br>$N_0 = N/10$ (LOG <sub>10</sub> N <sub>0</sub> = 7,33)<br>Is $7,17 \leq \text{LOG}_{10} N_0 \leq 7,70$ ? - YES |
|------------------|-----|-----|-------------------------------------------------------------------------------------------------------------------------------------------------------------------------------------------|
| 10 <sup>-6</sup> | 195 | 224 |                                                                                                                                                                                           |
| 10 <sup>-7</sup> | 22  | 25  |                                                                                                                                                                                           |

**Test**

| Concentration of the product % | Vc1      | Vc2      | Na = 10 $\bar{x}$ | LOG <sub>10</sub> Na | LOG <sub>10</sub> R (N <sub>0</sub> = 7,33) | Contact-time (min) |
|--------------------------------|----------|----------|-------------------|----------------------|---------------------------------------------|--------------------|
| 80                             | 0 (< 14) | 0 (< 14) | < 140             | < 2,15               | > 5,18                                      | 5 min              |

**Explanations**

Vc = count per mL (one plate or more)  
 $\bar{x}$  = average of Vc1 and Vc2  
 $\bar{x}_{\text{um}}$  = weighted mean of  $\bar{x}$   
 R = reduction (LOG<sub>10</sub> R = LOG<sub>10</sub> N<sub>0</sub> - LOG<sub>10</sub> Na)

Product-name: **Formula #6 Disinfectant 75 % with Oregano Oil and Oregano Water** | Batch No.: Product No.6

**Remarks:**

Methods used: Dilution neutralization method, pour plate method  
 Number of plates: 2/mL  
 Neutralizer: Polysorbate 80: 30 g/L; saponin: 30 g/L; lecithin: 3 g/L in diluent  
 Test temperature: 20 °C  
 Test organism: *Staphylococcus aureus*  
 Incubation temperature: 36 °C

Diluent used for product test solutions: distilled water  
 Appearance of the product test solutions: clear

**Validation and controls**

| Validation suspension (Nvo)                           |     |                 | Neutralizer control (B)                            |     |                 | Method validation (C)<br>Product concentration: 80%          |     |                 |
|-------------------------------------------------------|-----|-----------------|----------------------------------------------------|-----|-----------------|--------------------------------------------------------------|-----|-----------------|
| Vc1                                                   | 125 | $\bar{x} = 121$ | Vc1                                                | 112 | $\bar{x} = 109$ | Vc1                                                          | 111 | $\bar{x} = 102$ |
| Vc2                                                   | 116 |                 | Vc2                                                | 105 |                 | Vc2                                                          | 92  |                 |
| Is $30 \leq \bar{x}$ of Nvo $\leq 160$ ? - <b>YES</b> |     |                 | Is $\bar{x}$ of B $\geq 0,5x$ of Nvo? - <b>YES</b> |     |                 | Is $\bar{x}$ of C $\geq 0,5x$ $\bar{x}$ of Nvo? - <b>YES</b> |     |                 |

**Test suspension**

| N                | Vc1 | Vc2 | $\bar{x}_{\text{um}} = 232,73 \times 10^6$ (LOG <sub>10</sub> N = 8,37)<br>$N_0 = N/10$ (LOG <sub>10</sub> N <sub>0</sub> = 7,37)<br>Is $7,17 \leq \text{LOG}_{10} N_0 \leq 7,70$ ? - YES |
|------------------|-----|-----|-------------------------------------------------------------------------------------------------------------------------------------------------------------------------------------------|
| 10 <sup>-6</sup> | 244 | 229 |                                                                                                                                                                                           |
| 10 <sup>-7</sup> | 21  | 18  |                                                                                                                                                                                           |

**Test**

| Concentration of the product % | Vc1      | Vc2      | Na = 10 $\bar{x}$ | LOG <sub>10</sub> Na | LOG <sub>10</sub> R (N <sub>0</sub> = 7,37) | Contact-time (min) |
|--------------------------------|----------|----------|-------------------|----------------------|---------------------------------------------|--------------------|
| 80                             | 0 (< 14) | 0 (< 14) | < 140             | < 2,15               | > 5,22                                      | 5 min              |

**Explanations**

Vc = count per mL (one plate or more)  
 $\bar{x}$  = average of Vc1 and Vc2  
 $\bar{x}_{\text{um}}$  = weighted mean of  $\bar{x}$   
 R = reduction (LOG<sub>10</sub> R = LOG<sub>10</sub> N<sub>0</sub> - LOG<sub>10</sub> Na)

**Figure S5. Bactericidal activity of Formula #1 Disinfectant 75 % with Oregano Oil and Water.**

Product-name: **Formula #7 Disinfectant 70 % with Oregano Oil and Oregano Water** | Batch No.: Product No.7

**Remarks:**

Methods used: Dilution neutralization method, pour plate method  
 Number of plates: 2/mL  
 Neutralizer: Polysorbate 80: 30 g/L; saponin: 30 g/L; lecithin: 3 g/L in diluent  
 Test temperature: 20 °C  
 Test organism: *Pseudomonas aeruginosa*  
 Incubation temperature: 36 °C

Diluent used for product test solutions: distilled water  
 Appearance of the product test solutions: clear

**Validation and controls**

| Validation suspension (Nvo)           |     |          | Neutralizer control (B)                |    |         | Method validation (C)<br>Product concentration: 80% |    |         |
|---------------------------------------|-----|----------|----------------------------------------|----|---------|-----------------------------------------------------|----|---------|
| Vc1                                   | 98  | x̄ = 101 | Vc1                                    | 93 | x̄ = 95 | Vc1                                                 | 83 | x̄ = 87 |
| Vc2                                   | 103 |          | Vc2                                    | 96 |         | Vc2                                                 | 91 |         |
| Is 30 ≤ x̄ of Nvo ≤ 160? - <b>YES</b> |     |          | Is x̄ of B ≥ 0,5x of Nvo? - <b>YES</b> |    |         | Is x̄ of C ≥ 0,5x of Nvo? - <b>YES</b>              |    |         |

**Test suspension**

| N                | Vc1 | Vc2 | $\bar{x}_{\text{wm}} = 211,81 \times 10^6$ (LOG <sub>10</sub> N = 8,33)<br>$N_0 = N/10$ (LOG <sub>10</sub> N <sub>0</sub> = 7,33)<br>Is $7,17 \leq \text{LOG}_{10} N_0 \leq 7,70$ ? - YES |
|------------------|-----|-----|-------------------------------------------------------------------------------------------------------------------------------------------------------------------------------------------|
| 10 <sup>-6</sup> | 195 | 224 |                                                                                                                                                                                           |
| 10 <sup>-7</sup> | 22  | 25  |                                                                                                                                                                                           |

**Test**

| Concentration of the product % | Vc1      | Vc2      | Na = 10 $\bar{x}$ | LOG <sub>10</sub> Na | LOG <sub>10</sub> R (N <sub>0</sub> = 7,33) | Contact-time (min) |
|--------------------------------|----------|----------|-------------------|----------------------|---------------------------------------------|--------------------|
| 80                             | 0 (< 14) | 0 (< 14) | < 140             | < 2,15               | > 5,18                                      | 5 min              |

**Explanations**

Vc = count per mL (one plate or more)  
 $\bar{x}$  = average of Vc1 and Vc2  
 $\bar{x}_{\text{wm}}$  = weighted mean of  $\bar{x}$   
 R = reduction (LOG<sub>10</sub> R = LOG<sub>10</sub> N<sub>0</sub> - LOG<sub>10</sub> Na)

Product-name: **Formula #6 Disinfectant 70 % with Oregano Oil and Oregano Water** | Batch No.: Product No.7

**Remarks:**

Methods used: Dilution neutralization method, pour plate method  
 Number of plates: 2/mL  
 Neutralizer: Polysorbate 80: 30 g/L; saponin: 30 g/L; lecithin: 3 g/L in diluent  
 Test temperature: 20 °C  
 Test organism: *Staphylococcus aureus*  
 Incubation temperature: 36 °C

Diluent used for product test solutions: distilled water  
 Appearance of the product test solutions: clear

**Validation and controls**

| Validation suspension (Nvo)           |     |          | Neutralizer control (B)                |     |          | Method validation (C)<br>Product concentration: 80% |     |          |
|---------------------------------------|-----|----------|----------------------------------------|-----|----------|-----------------------------------------------------|-----|----------|
| Vc1                                   | 125 | x̄ = 121 | Vc1                                    | 112 | x̄ = 109 | Vc1                                                 | 111 | x̄ = 105 |
| Vc2                                   | 116 |          | Vc2                                    | 105 |          | Vc2                                                 | 99  |          |
| Is 30 ≤ x̄ of Nvo ≤ 160? - <b>YES</b> |     |          | Is x̄ of B ≥ 0,5x of Nvo? – <b>YES</b> |     |          | Is x̄ of C ≥ 0,5x x̄ of Nvo? – <b>YES</b>           |     |          |

**Test suspension**

| N                | Vc1 | Vc2 | $\bar{x}_{\text{wm}} = 232,73 \times 10^6$ (LOG <sub>10</sub> N = 8,37)<br>$N_0 = N/10$ (LOG <sub>10</sub> N <sub>0</sub> = 7,37)<br>Is $7,17 \leq \text{LOG}_{10} N_0 \leq 7,70$ ? - YES |
|------------------|-----|-----|-------------------------------------------------------------------------------------------------------------------------------------------------------------------------------------------|
| 10 <sup>-6</sup> | 244 | 229 |                                                                                                                                                                                           |
| 10 <sup>-7</sup> | 21  | 18  |                                                                                                                                                                                           |

**Test**

| Concentration of the product % | Vc1      | Vc2      | Na = 10 $\bar{x}$ | LOG <sub>10</sub> Na | LOG <sub>10</sub> R (N <sub>0</sub> = 7,37) | Contact-time (min) |
|--------------------------------|----------|----------|-------------------|----------------------|---------------------------------------------|--------------------|
| 80                             | 0 (< 14) | 0 (< 14) | < 140             | < 2,15               | > 5,22                                      | 5 min              |

**Explanations**

Vc = count per mL (one plate or more)  
 $\bar{x}$  = average of Vc1 and Vc2  
 $\bar{x}_{\text{wm}}$  = weighted mean of  $\bar{x}$   
 R = reduction (LOG<sub>10</sub> R = LOG<sub>10</sub> N<sub>0</sub> - LOG<sub>10</sub> Na)

**Figure S6. Bactericidal activity of Formula #1 Disinfectant 70 % with Oregano Oil and Water.**

Product-name: **Essential oil of Lavender** | Batch No.: Product No.4

**Remarks:**

Methods used: Dilution neutralization method, pour plate method  
 Number of plates: 2/mL  
 Neutralizer: Polysorbate 80: 30 g/L; saponin: 30 g/L; lecithin: 3 g/L in diluent  
 Test temperature: 20 °C  
 Test organism: *Pseudomonas aeruginosa*  
 Incubation temperature: 36 °C

Diluent used for product test solutions: distilled water  
 Appearance of the product test solutions: clear

**Validation and controls**

| Validation suspension (Nvo)                           |     |                 | Neutralizer control (B)                            |    |                | Method validation (C)<br>Product concentration: 80%          |    |                |
|-------------------------------------------------------|-----|-----------------|----------------------------------------------------|----|----------------|--------------------------------------------------------------|----|----------------|
| Vc1                                                   | 98  | $\bar{x} = 101$ | Vc1                                                | 93 | $\bar{x} = 95$ | Vc1                                                          | 69 | $\bar{x} = 73$ |
| Vc2                                                   | 103 |                 | Vc2                                                | 96 |                | Vc2                                                          | 77 |                |
| Is $30 \leq \bar{x}$ of Nvo $\leq 160$ ? - <b>YES</b> |     |                 | Is $\bar{x}$ of B $\geq 0,5x$ of Nvo? – <b>YES</b> |    |                | Is $\bar{x}$ of C $\geq 0,5x$ $\bar{x}$ of Nvo? – <b>YES</b> |    |                |

**Test suspension**

| N                | Vc1 | Vc2 | $\bar{x}_{\text{wm}} = 211,81 \times 10^6$ (LOG <sub>10</sub> N = 8,33)<br>$N_0 = N/10$ (LOG <sub>10</sub> N <sub>0</sub> = 7,33)<br>Is $7,17 \leq \text{LOG}_{10} N_0 \leq 7,70$ ? - YES |
|------------------|-----|-----|-------------------------------------------------------------------------------------------------------------------------------------------------------------------------------------------|
| 10 <sup>-6</sup> | 195 | 224 |                                                                                                                                                                                           |
| 10 <sup>-7</sup> | 22  | 25  |                                                                                                                                                                                           |

**Test**

| Concentration of the product % | Vc1      | Vc2      | Na = 10 $\bar{x}$ | LOG <sub>10</sub> Na | LOG <sub>10</sub> R<br>(N <sub>0</sub> = 7,33) | Contact-time (min) |
|--------------------------------|----------|----------|-------------------|----------------------|------------------------------------------------|--------------------|
| 80                             | 0 (< 14) | 0 (< 14) | < 140             | < 2,15               | > 5,18                                         | 5 min              |

**Explanations**

Vc = count per mL (one plate or more)  
 $\bar{x}$  = average of Vc1 and Vc2  
 $\bar{x}_{\text{wm}}$  = weighted mean of  $\bar{x}$   
 R = reduction (LOG<sub>10</sub> R = LOG<sub>10</sub> N<sub>0</sub> - LOG<sub>10</sub> Na)

Product-name: **Essential oil of Lavender** | Batch No.: Product No.4

**Remarks:**

Methods used: Dilution neutralization method, pour plate method  
 Number of plates: 2/mL  
 Neutralizer: Polysorbate 80: 30 g/L; saponin: 30 g/L; lecithin: 3 g/L in diluent  
 Test temperature: 20 °C  
 Test organism: *Staphylococcus aureus*  
 Incubation temperature: 36 °C

Diluent used for product test solutions: distilled water  
 Appearance of the product test solutions: clear

**Validation and controls**

| Validation suspension (Nvo)                           |     |                 | Neutralizer control (B)                            |     |                 | Method validation (C)<br>Product concentration: 80%          |    |                |
|-------------------------------------------------------|-----|-----------------|----------------------------------------------------|-----|-----------------|--------------------------------------------------------------|----|----------------|
| Vc1                                                   | 125 | $\bar{x} = 121$ | Vc1                                                | 112 | $\bar{x} = 109$ | Vc1                                                          | 97 | $\bar{x} = 91$ |
| Vc2                                                   | 116 |                 | Vc2                                                | 105 |                 | Vc2                                                          | 85 |                |
| Is $30 \leq \bar{x}$ of Nvo $\leq 160$ ? - <b>YES</b> |     |                 | Is $\bar{x}$ of B $\geq 0,5x$ of Nvo? – <b>YES</b> |     |                 | Is $\bar{x}$ of C $\geq 0,5x$ $\bar{x}$ of Nvo? – <b>YES</b> |    |                |

**Test suspension**

| N                | Vc1 | Vc2 | $\bar{x}_{\text{wm}} = 232,73 \times 10^6$ (LOG <sub>10</sub> N = 8,37)<br>$N_0 = N/10$ (LOG <sub>10</sub> N <sub>0</sub> = 7,37)<br>Is $7,17 \leq \text{LOG}_{10} N_0 \leq 7,70$ ? - YES |
|------------------|-----|-----|-------------------------------------------------------------------------------------------------------------------------------------------------------------------------------------------|
| 10 <sup>-6</sup> | 244 | 229 |                                                                                                                                                                                           |
| 10 <sup>-7</sup> | 21  | 18  |                                                                                                                                                                                           |

**Test**

| Concentration of the product % | Vc1      | Vc2      | Na = 10 $\bar{x}$ | LOG <sub>10</sub> Na | LOG <sub>10</sub> R<br>(N <sub>0</sub> = 7,37) | Contact-time (min) |
|--------------------------------|----------|----------|-------------------|----------------------|------------------------------------------------|--------------------|
| 80                             | 0 (< 14) | 0 (< 14) | < 140             | < 2,15               | > 5,22                                         | 5 min              |

**Explanations**

Vc = count per mL (one plate or more)  
 $\bar{x}$  = average of Vc1 and Vc2  
 $\bar{x}_{\text{wm}}$  = weighted mean of  $\bar{x}$   
 R = reduction (LOG<sub>10</sub> R = LOG<sub>10</sub> N<sub>0</sub> - LOG<sub>10</sub> Na)

**Figure S7. Bactericidal activity of Lavender Oil.**

Product-name: **Essential oil of Oregano** | Batch No.: Product No.8

**Remarks:**

Methods used: Dilution neutralization method, pour plate method  
 Number of plates: 2/mL  
 Neutralizer: Polysorbate 80: 30 g/L; saponin: 30 g/L; lecithin: 3 g/L in diluent  
 Test temperature: 20 °C  
 Test organism: *Pseudomonas aeruginosa*  
 Incubation temperature: 36 °C

Diluent used for product test solutions: distilled water  
 Appearance of the product test solutions: clear

**Validation and controls**

| Validation suspension (Nvo)                           |     |                 | Neutralizer control (B)                            |    | Method validation (C)<br>Product concentration: 80%          |     |    |                |
|-------------------------------------------------------|-----|-----------------|----------------------------------------------------|----|--------------------------------------------------------------|-----|----|----------------|
| Vc1                                                   | 98  | $\bar{x} = 101$ | Vc1                                                | 93 | $\bar{x} = 95$                                               | Vc1 | 60 | $\bar{x} = 66$ |
| Vc2                                                   | 103 |                 | Vc2                                                | 96 |                                                              | Vc2 | 71 |                |
| Is $30 \leq \bar{x}$ of Nvo $\leq 160$ ? - <b>YES</b> |     |                 | Is $\bar{x}$ of B $\geq 0,5x$ of Nvo? – <b>YES</b> |    | Is $\bar{x}$ of C $\geq 0,5x$ $\bar{x}$ of Nvo? – <b>YES</b> |     |    |                |

**Test suspension**

| N                | Vc1 | Vc2 | $\bar{x}_{\text{wm}} = 211,81 \times 10^6$ (LOG <sub>10</sub> N = 8,33)<br>$N_0 = N/10$ (LOG <sub>10</sub> N <sub>0</sub> = 7,33)<br>Is $7,17 \leq \text{LOG}_{10} N_0 \leq 7,70$ ? - YES |
|------------------|-----|-----|-------------------------------------------------------------------------------------------------------------------------------------------------------------------------------------------|
| 10 <sup>-6</sup> | 195 | 224 |                                                                                                                                                                                           |
| 10 <sup>-7</sup> | 22  | 25  |                                                                                                                                                                                           |

**Test**

| Concentration of the product % | Vc1      | Vc2      | Na = 10x | LOG <sub>10</sub> Na | LOG <sub>10</sub> R (N <sub>0</sub> = 7,33) | Contact-time (min) |
|--------------------------------|----------|----------|----------|----------------------|---------------------------------------------|--------------------|
| 80                             | 0 (< 14) | 0 (< 14) | < 140    | < 2,15               | > 5,18                                      | 5 min              |

**Explanations**

Vc = count per mL (one plate or more)  
 $\bar{x}$  = average of Vc1 and Vc2  
 $\bar{x}_{\text{wm}}$  = weighted mean of  $\bar{x}$   
 R = reduction (LOG<sub>10</sub> R = LOG<sub>10</sub> N<sub>0</sub> - LOG<sub>10</sub> Na)

Product-name: **Essential oil of Oregano** | Batch No.: Product No.8

**Remarks:**

Methods used: Dilution neutralization method, pour plate method  
 Number of plates: 2/mL  
 Neutralizer: Polysorbate 80: 30 g/L; saponin: 30 g/L; lecithin: 3 g/L in diluent  
 Test temperature: 20 °C  
 Test organism: *Staphylococcus aureus*  
 Incubation temperature: 36 °C

Diluent used for product test solutions: distilled water  
 Appearance of the product test solutions: clear

**Validation and controls**

| Validation suspension (Nvo)                           |     |                 | Neutralizer control (B)                            |     |                 | Method validation (C)<br>Product concentration: 80%          |    |                |
|-------------------------------------------------------|-----|-----------------|----------------------------------------------------|-----|-----------------|--------------------------------------------------------------|----|----------------|
| Vc1                                                   | 125 | $\bar{x} = 121$ | Vc1                                                | 112 | $\bar{x} = 109$ | Vc1                                                          | 86 | $\bar{x} = 79$ |
| Vc2                                                   | 116 |                 | Vc2                                                | 105 |                 | Vc2                                                          | 72 |                |
| Is $30 \leq \bar{x}$ of Nvo $\leq 160$ ? - <b>YES</b> |     |                 | Is $\bar{x}$ of B $\geq 0,5x$ of Nvo? - <b>YES</b> |     |                 | Is $\bar{x}$ of C $\geq 0,5x$ $\bar{x}$ of Nvo? - <b>YES</b> |    |                |

**Test suspension**

| N                | Vc1 | Vc2 | $\bar{x}_{\text{wm}} = 232,73 \times 10^6$ (LOG <sub>10</sub> N = 8,37)<br>$N_0 = N/10$ (LOG <sub>10</sub> N <sub>0</sub> = 7,37)<br>Is $7,17 \leq \text{LOG}_{10} N_0 \leq 7,70$ ? - YES |
|------------------|-----|-----|-------------------------------------------------------------------------------------------------------------------------------------------------------------------------------------------|
| 10 <sup>-6</sup> | 244 | 229 |                                                                                                                                                                                           |
| 10 <sup>-7</sup> | 21  | 18  |                                                                                                                                                                                           |

**Test**

| Concentration of the product % | Vc1      | Vc2      | Na = 10x | LOG <sub>10</sub> Na | LOG <sub>10</sub> R (N <sub>0</sub> = 7,37) | Contact-time (min) |
|--------------------------------|----------|----------|----------|----------------------|---------------------------------------------|--------------------|
| 80                             | 0 (< 14) | 0 (< 14) | < 140    | < 2,15               | > 5,22                                      | 5 min              |

**Explanations**

Vc = count per mL (one plate or more)  
 $\bar{x}$  = average of Vc1 and Vc2  
 $\bar{x}_{\text{wm}}$  = weighted mean of  $\bar{x}$   
 R = reduction (LOG<sub>10</sub> R = LOG<sub>10</sub> N<sub>0</sub> - LOG<sub>10</sub> Na)

**Figure S8. Bactericidal activity of Oregano Oil.**
